# Supplementary material for: SPIN1 promotes tumorigenesis by blocking the uL18 (universal large ribosomal subunit protein 18)-MDM2-p53 pathway in human cancer
Source: eLife journal article supplement (doi:10.7554/elife.31275), 2018-03-16
Supplement: supp [file elife-31275-supp-v1.zip]

Archive with 10 entries (10 files):
- elife_poa_e31275_Figure_2_figure_supplement_1.jpg
- elife_poa_e31275_Figure_6_figure_supplement_4.jpg
- elife_poa_e31275_Figure_6_figure_supplement_2.jpg
- elife_poa_e31275_Figure_4_figure_supplement_1.jpg
- elife_poa_e31275_Figure_6_figure_supplement_3.jpg
- elife_poa_e31275_Figure_5_figure_supplement_1.jpg
- elife_poa_e31275_Figure_1_figure_supplement_1.jpg
- elife_poa_e31275_Figure_6_figure_supplement_1.jpg
- elife_poa_e31275_Transparent_Reporting_File.pdf
- elife_poa_e31275_Figure_5_figure_supplement_2.jpg
