# Supplementary figures and images for: SPIN1 promotes tumorigenesis by blocking the uL18 (universal large ribosomal subunit protein 18)-MDM2-p53 pathway in human cancer
Source: eLife journal article supplement (doi:10.7554/elife.31275), 2018-03-16

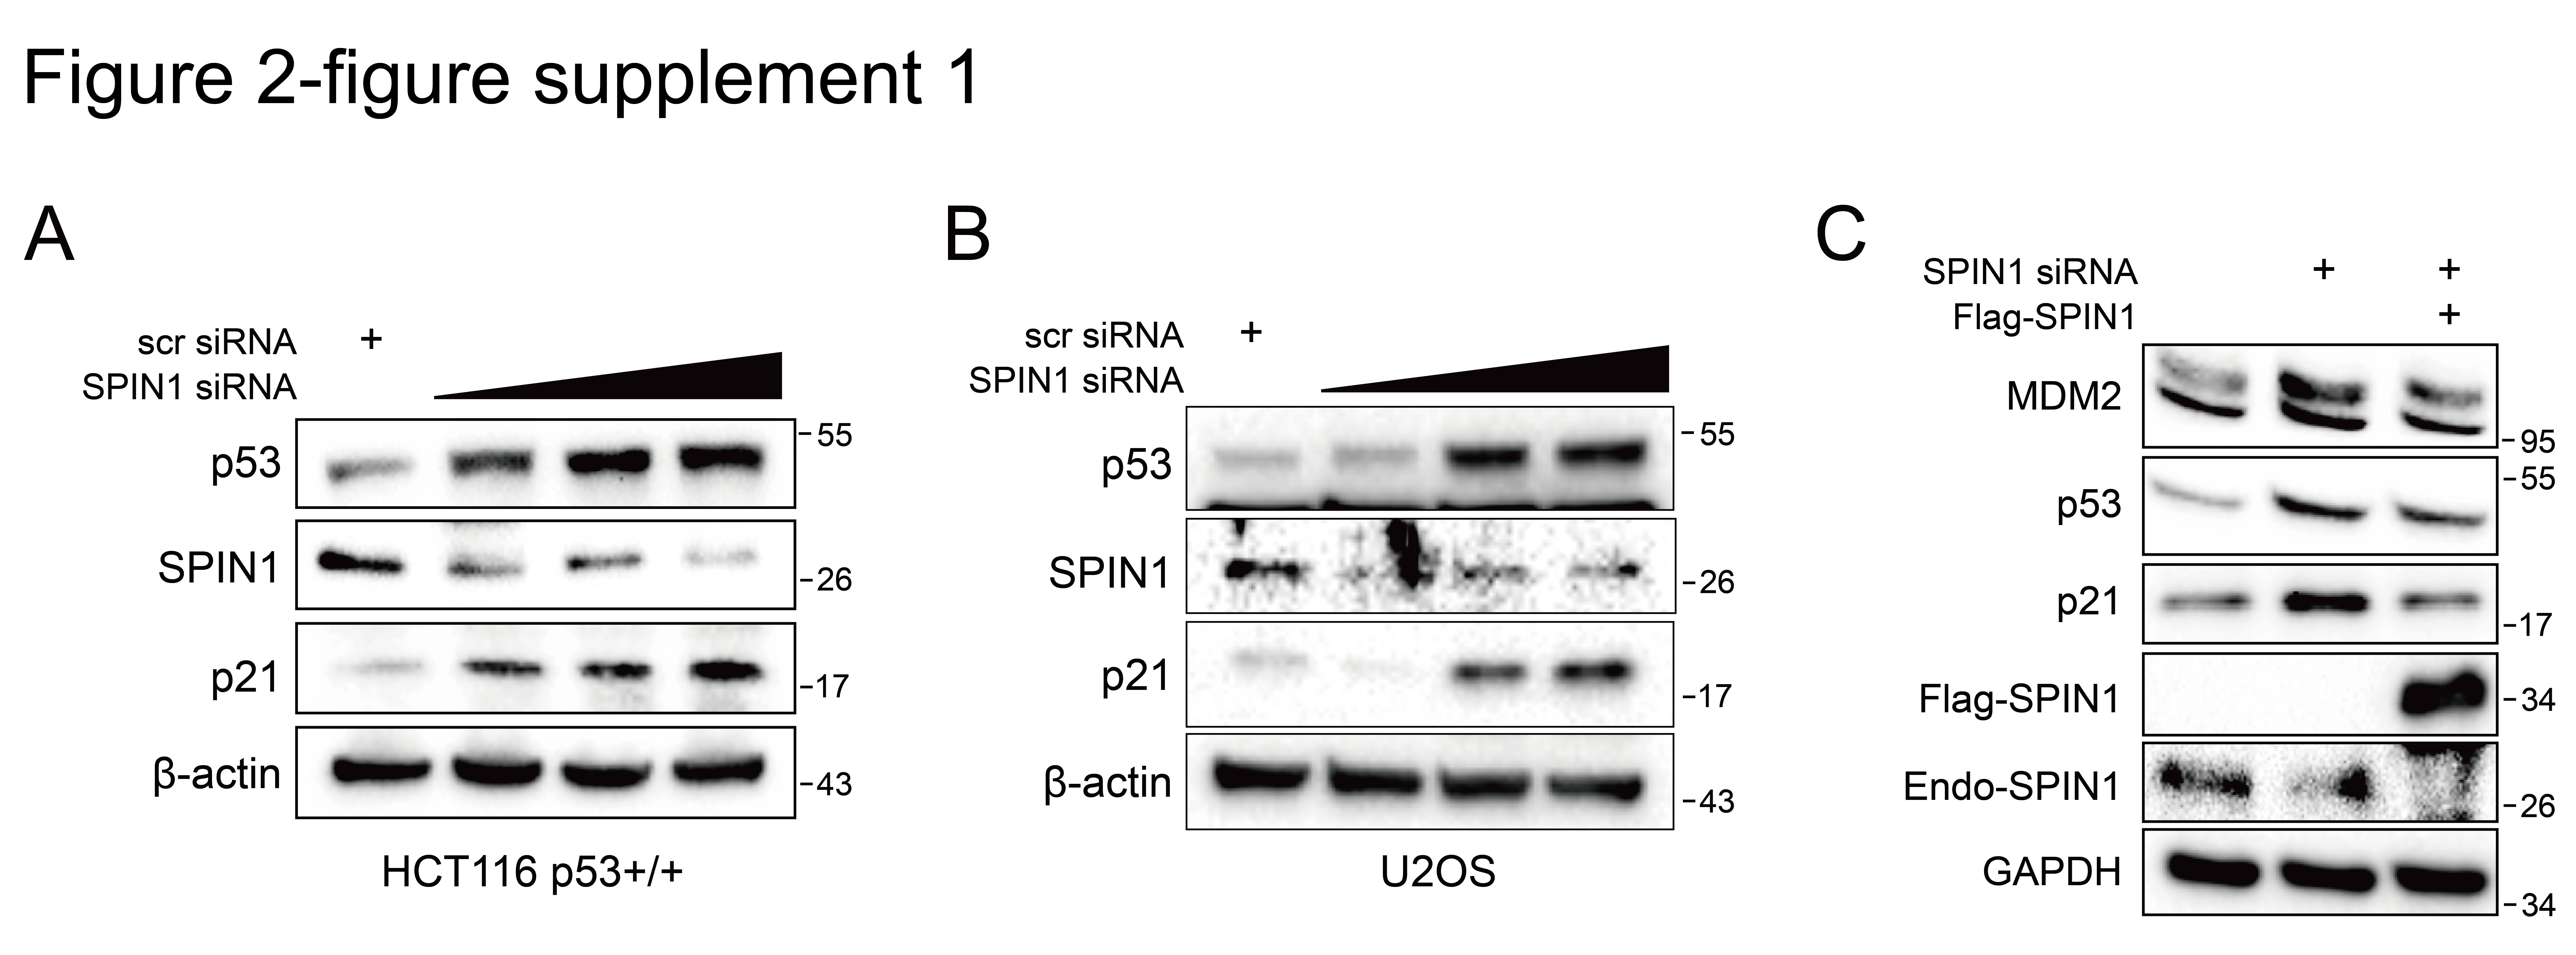

Supplement: supp [file elife-31275-supp-v1.zip › elife_poa_e31275_Figure_2_figure_supplement_1.jpg]

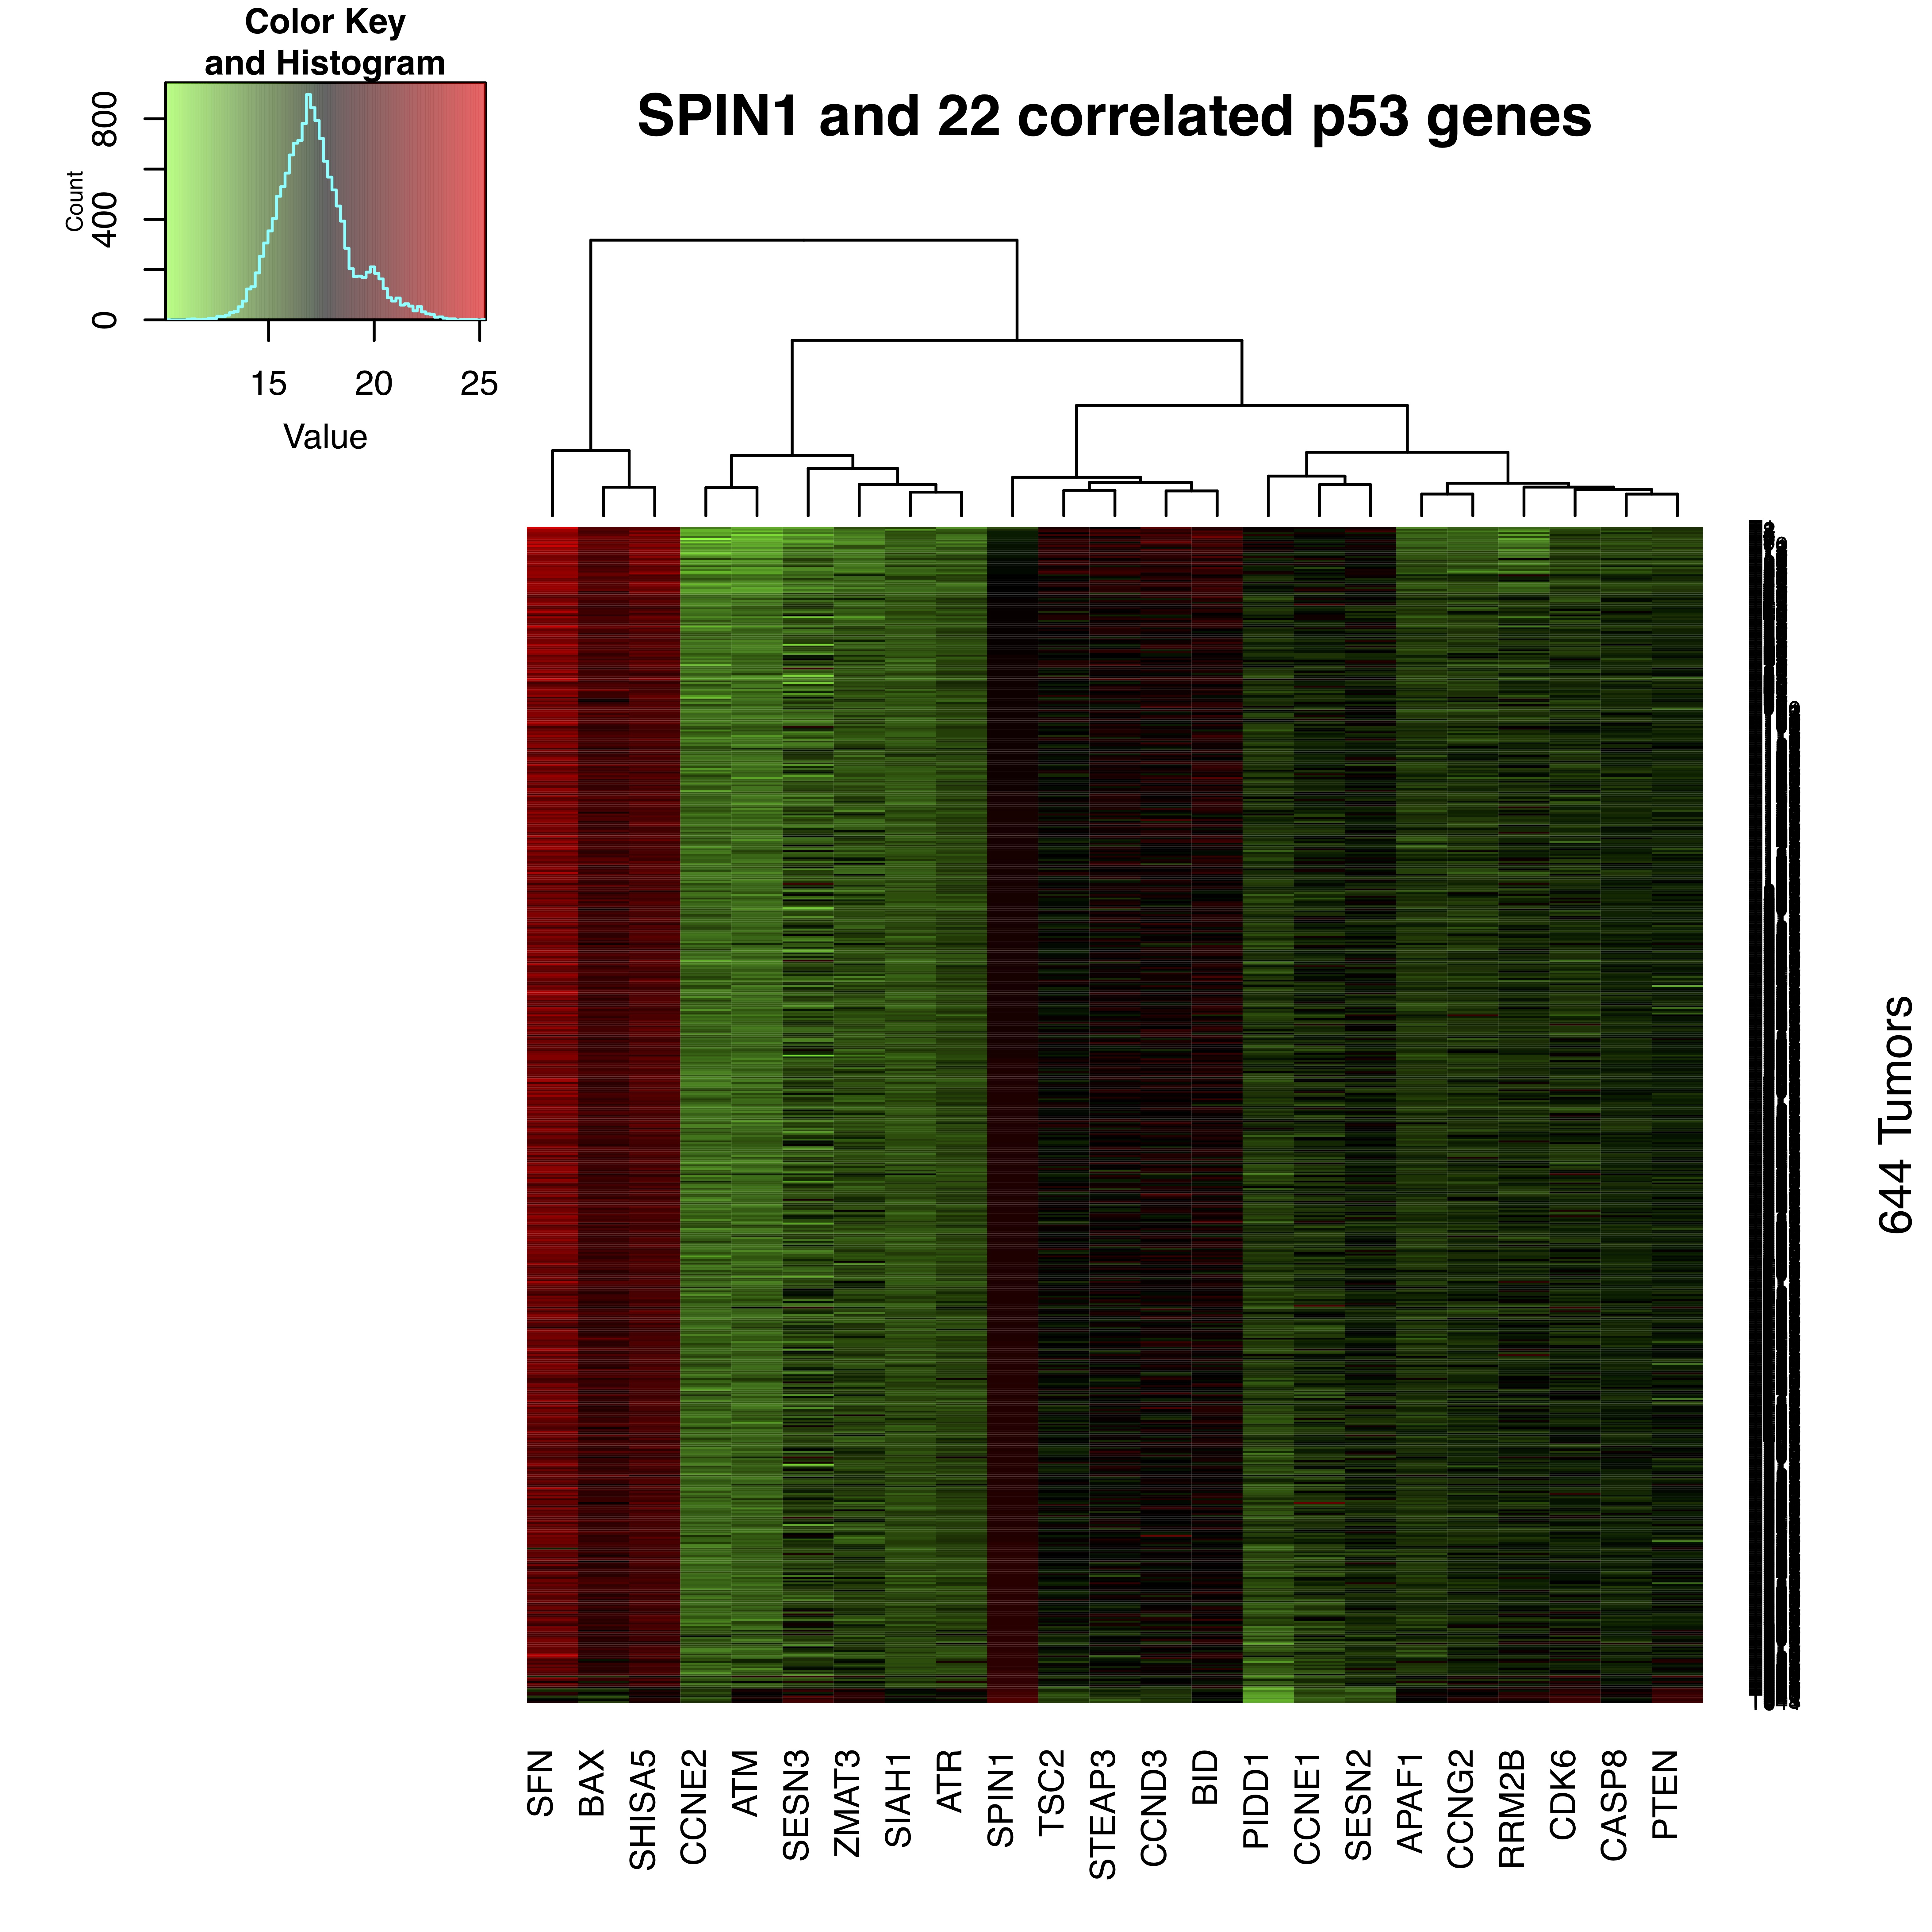

Supplement: supp [file elife-31275-supp-v1.zip › elife_poa_e31275_Figure_6_figure_supplement_4.jpg]

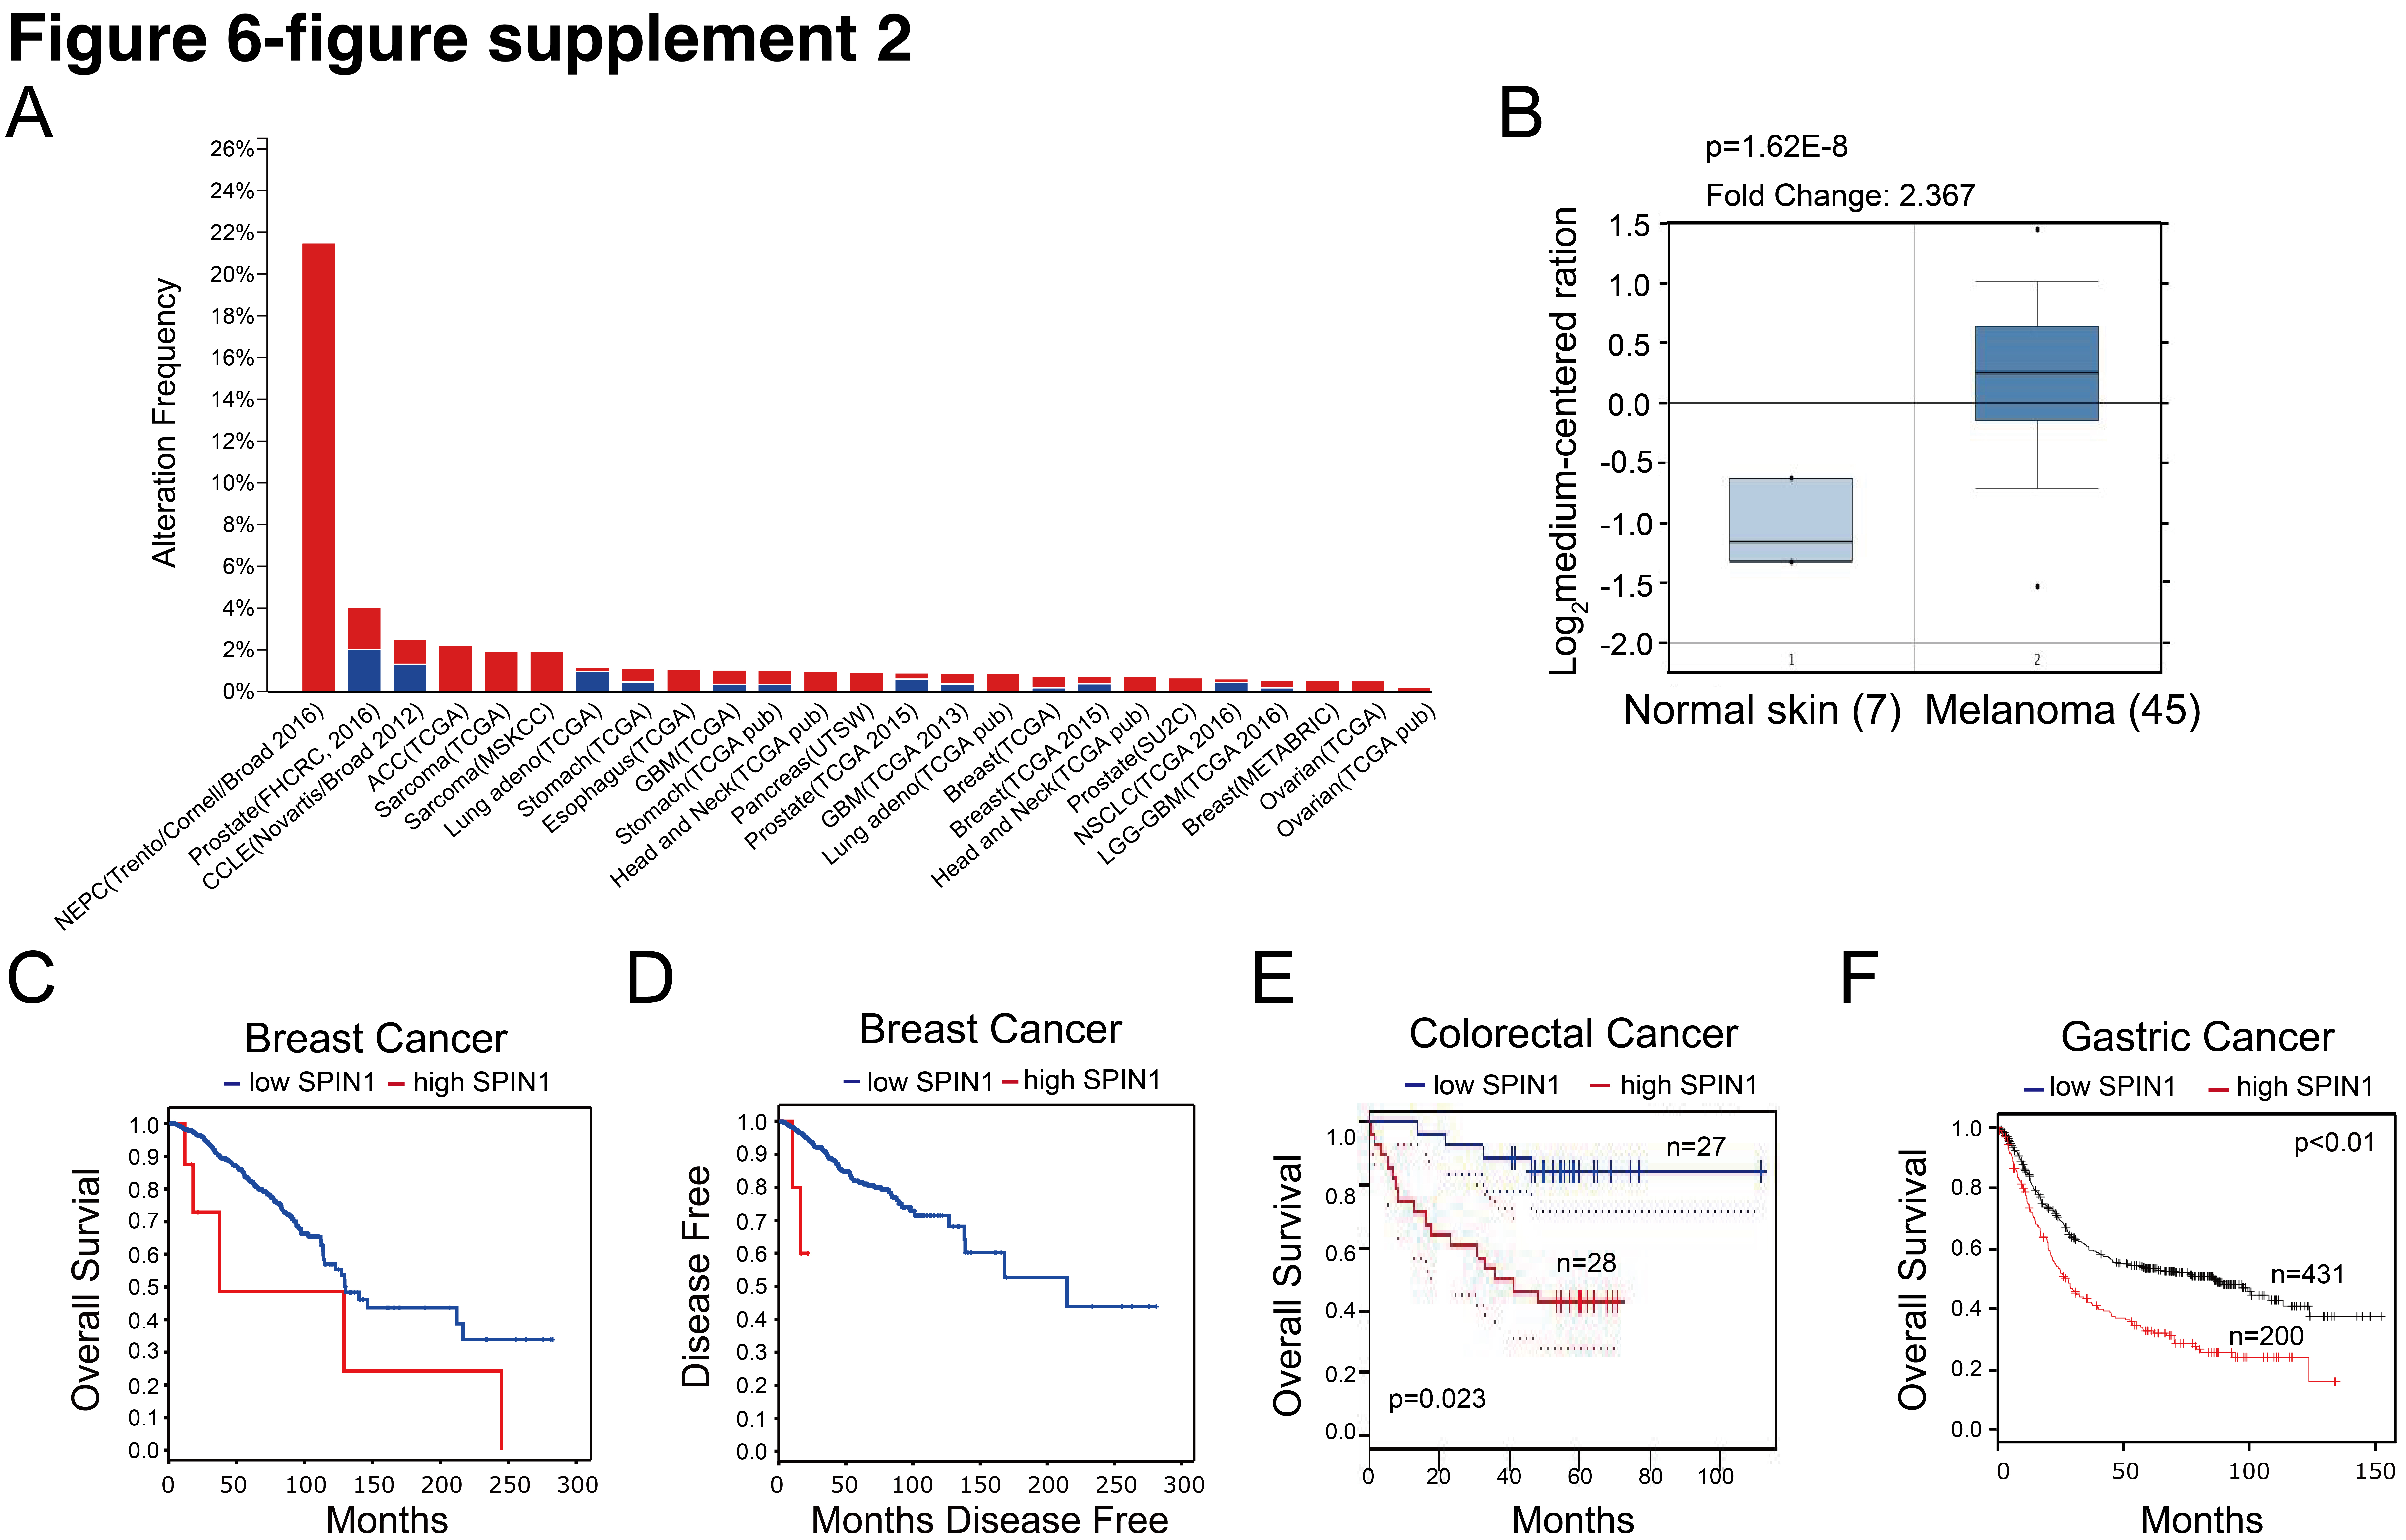

Supplement: supp [file elife-31275-supp-v1.zip › elife_poa_e31275_Figure_6_figure_supplement_2.jpg]

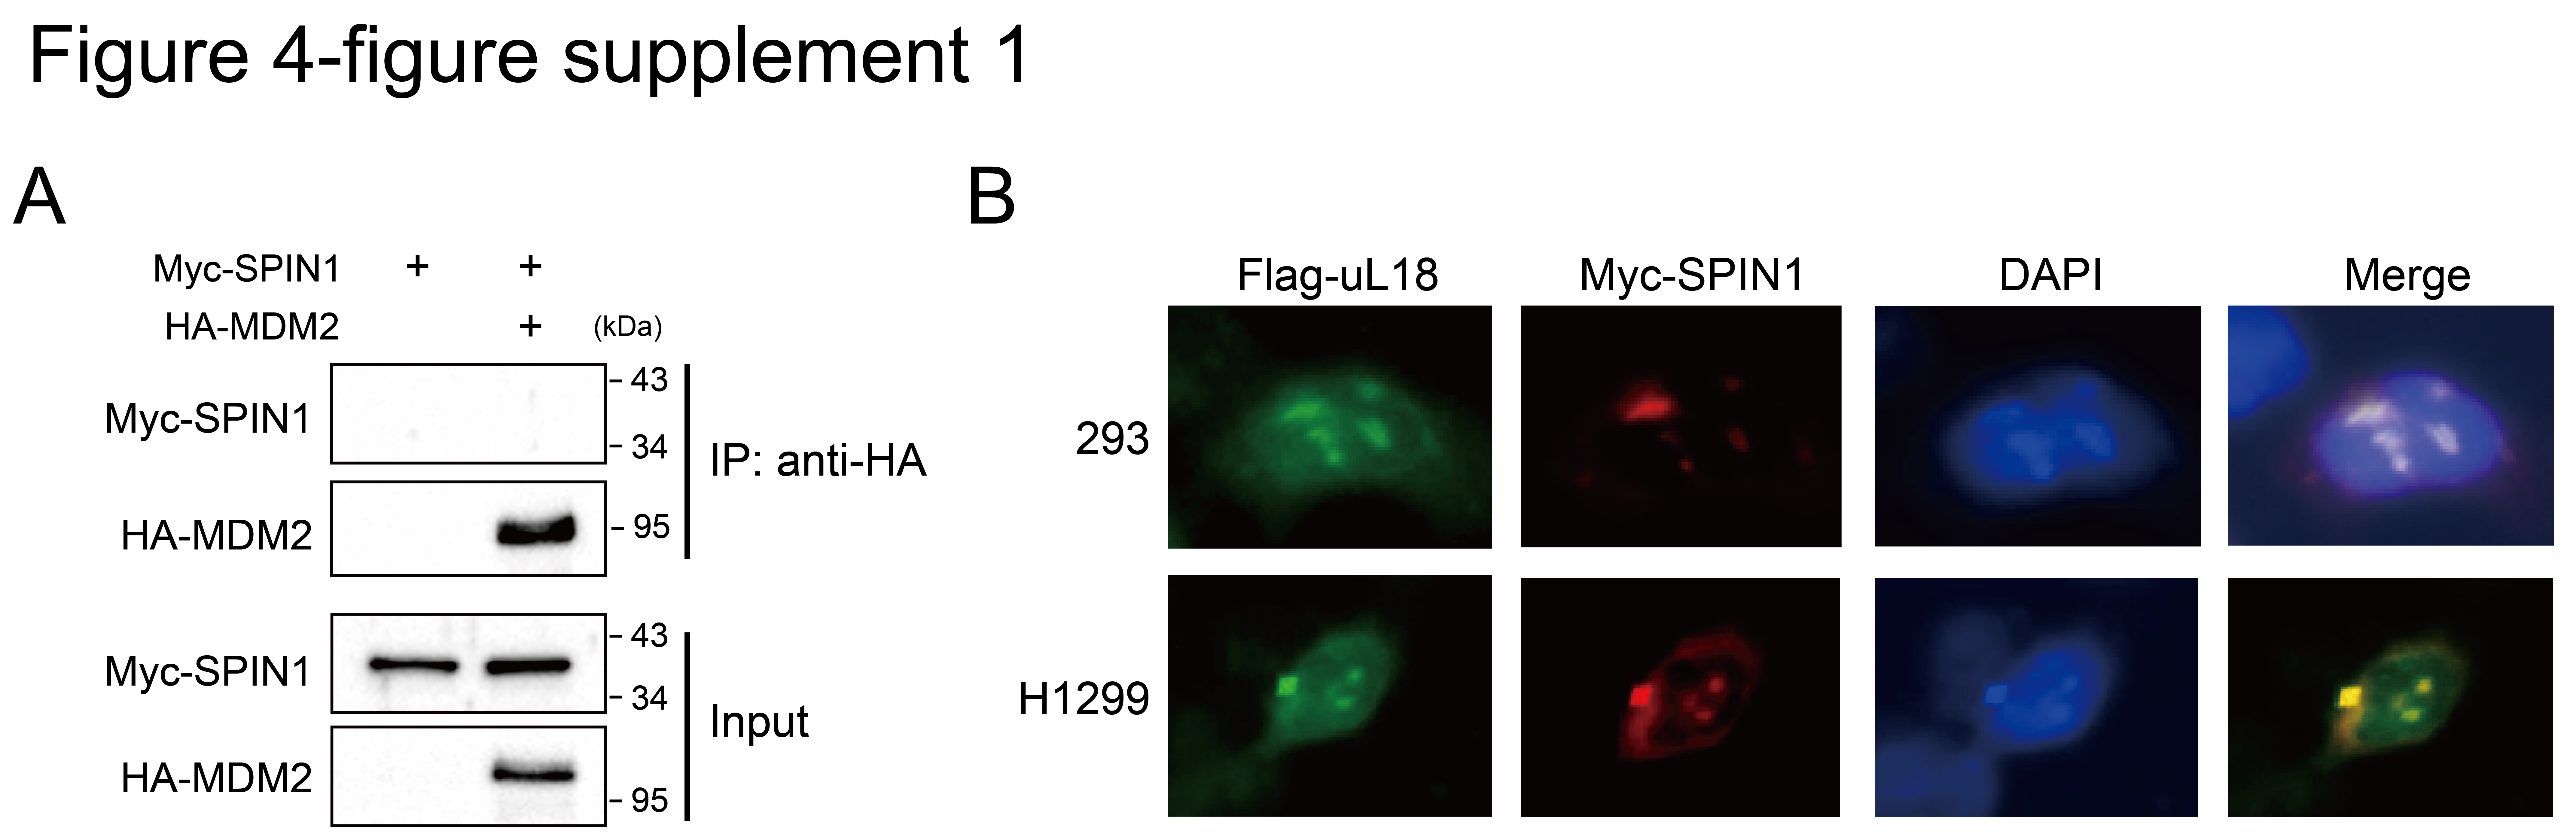

Supplement: supp [file elife-31275-supp-v1.zip › elife_poa_e31275_Figure_4_figure_supplement_1.jpg]

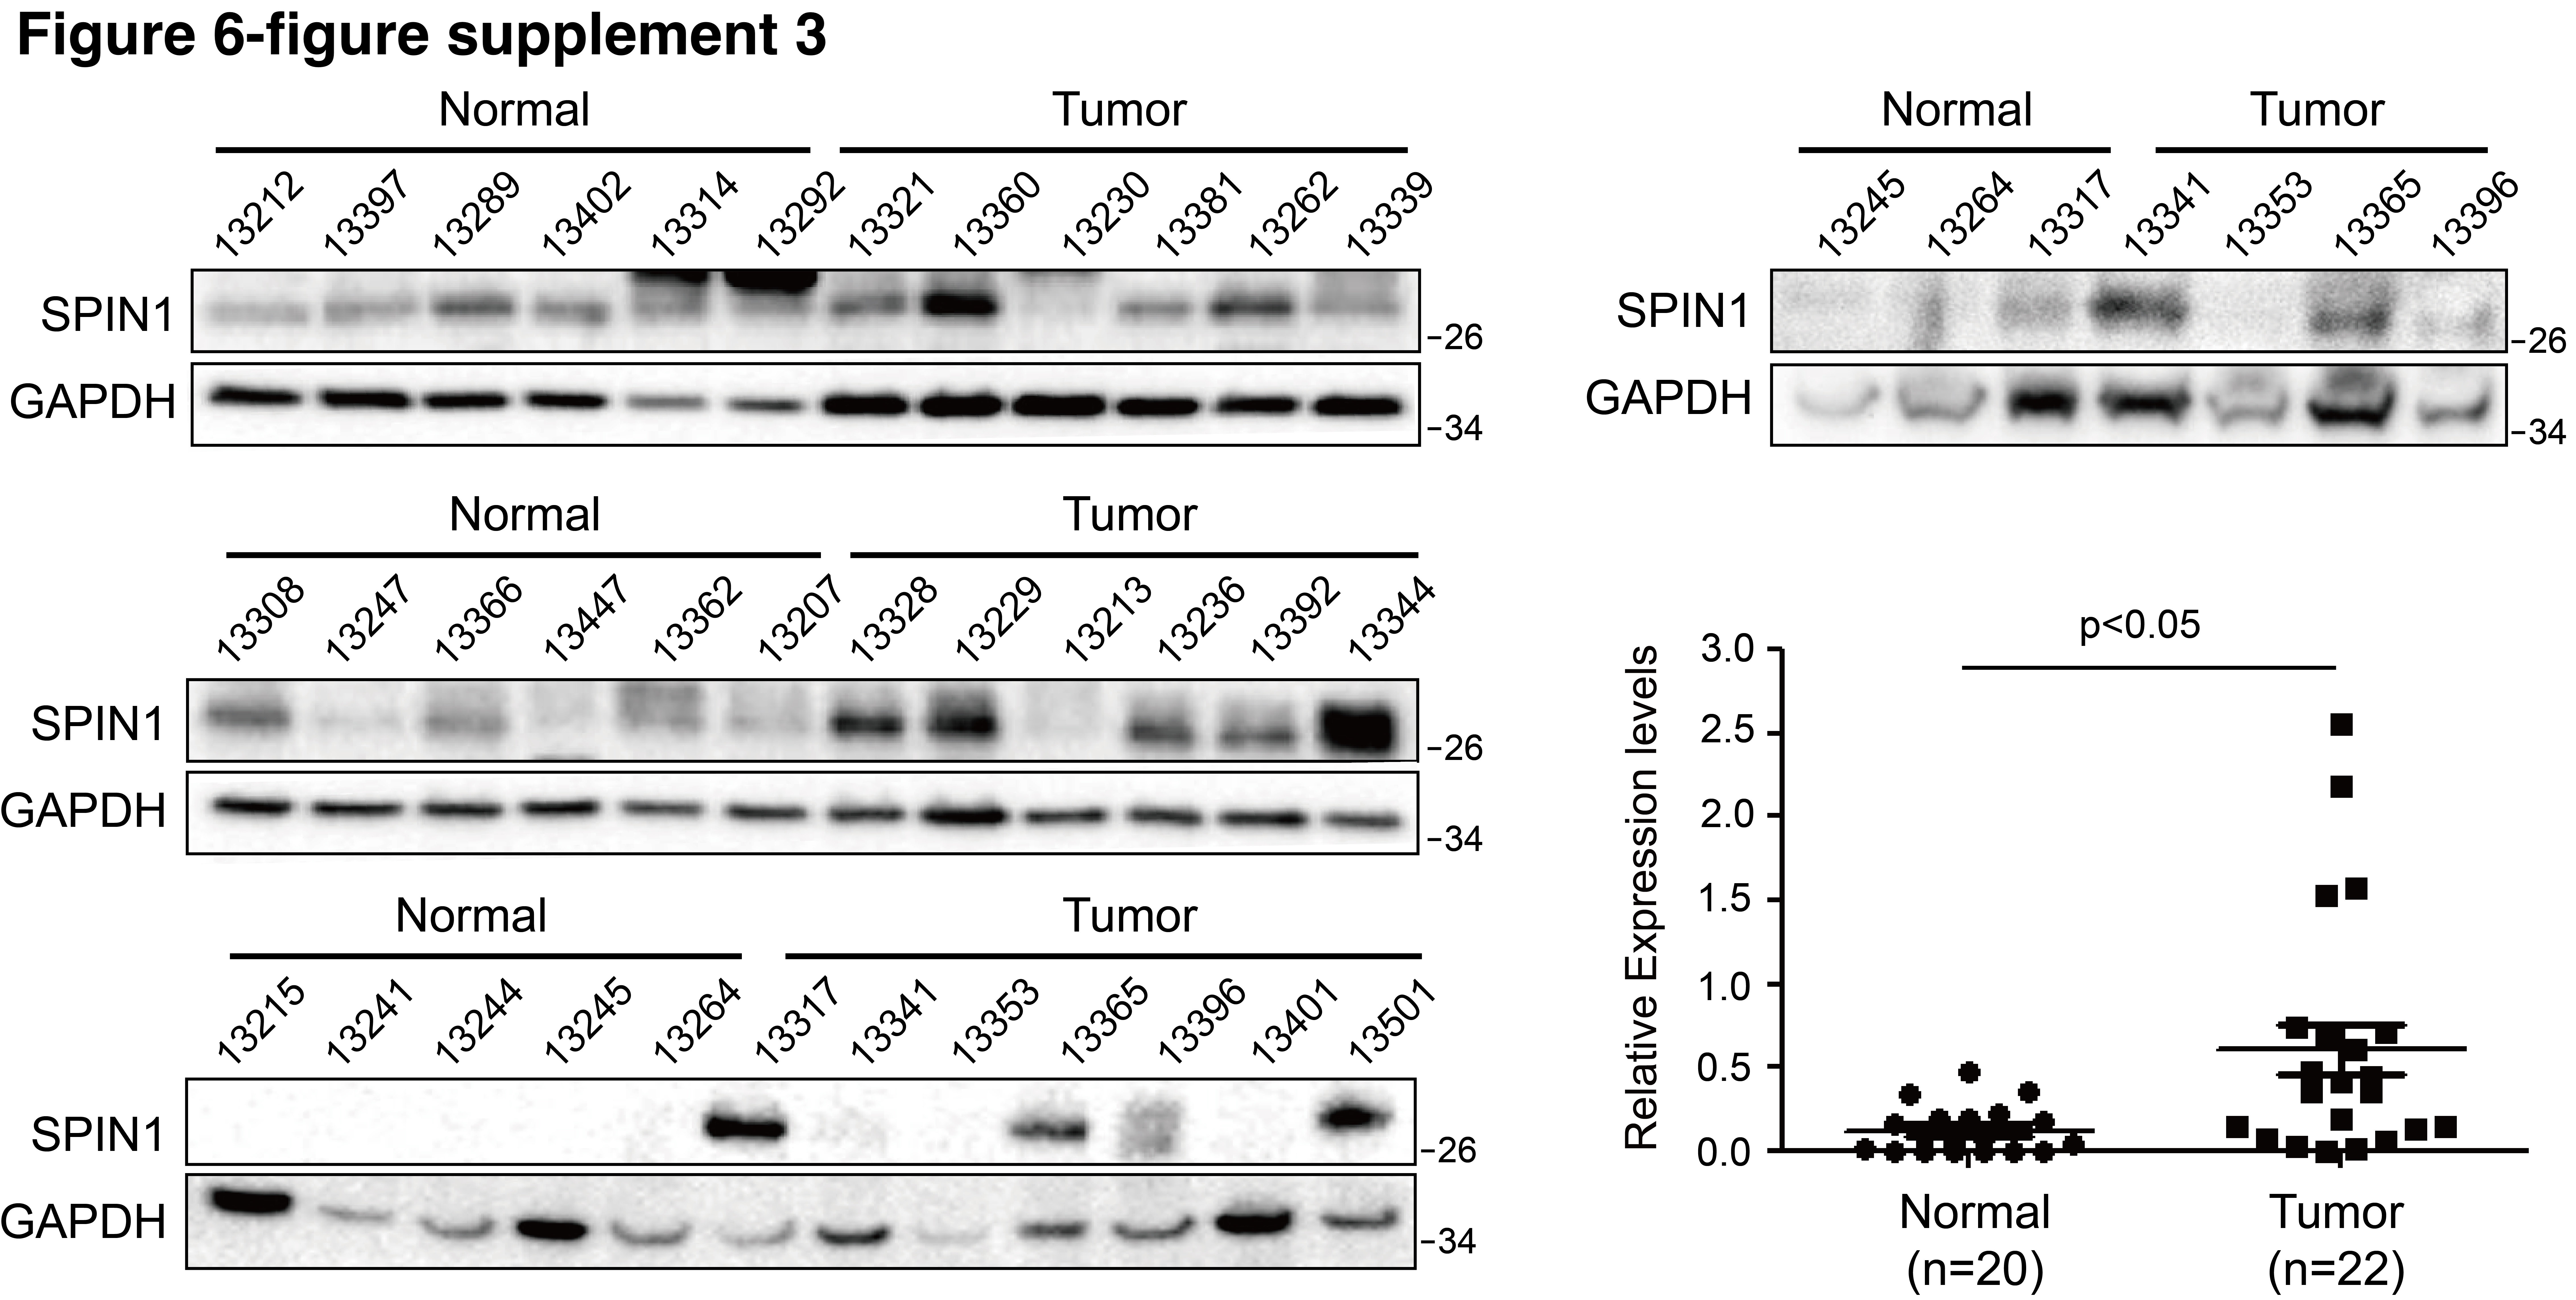

Supplement: supp [file elife-31275-supp-v1.zip › elife_poa_e31275_Figure_6_figure_supplement_3.jpg]

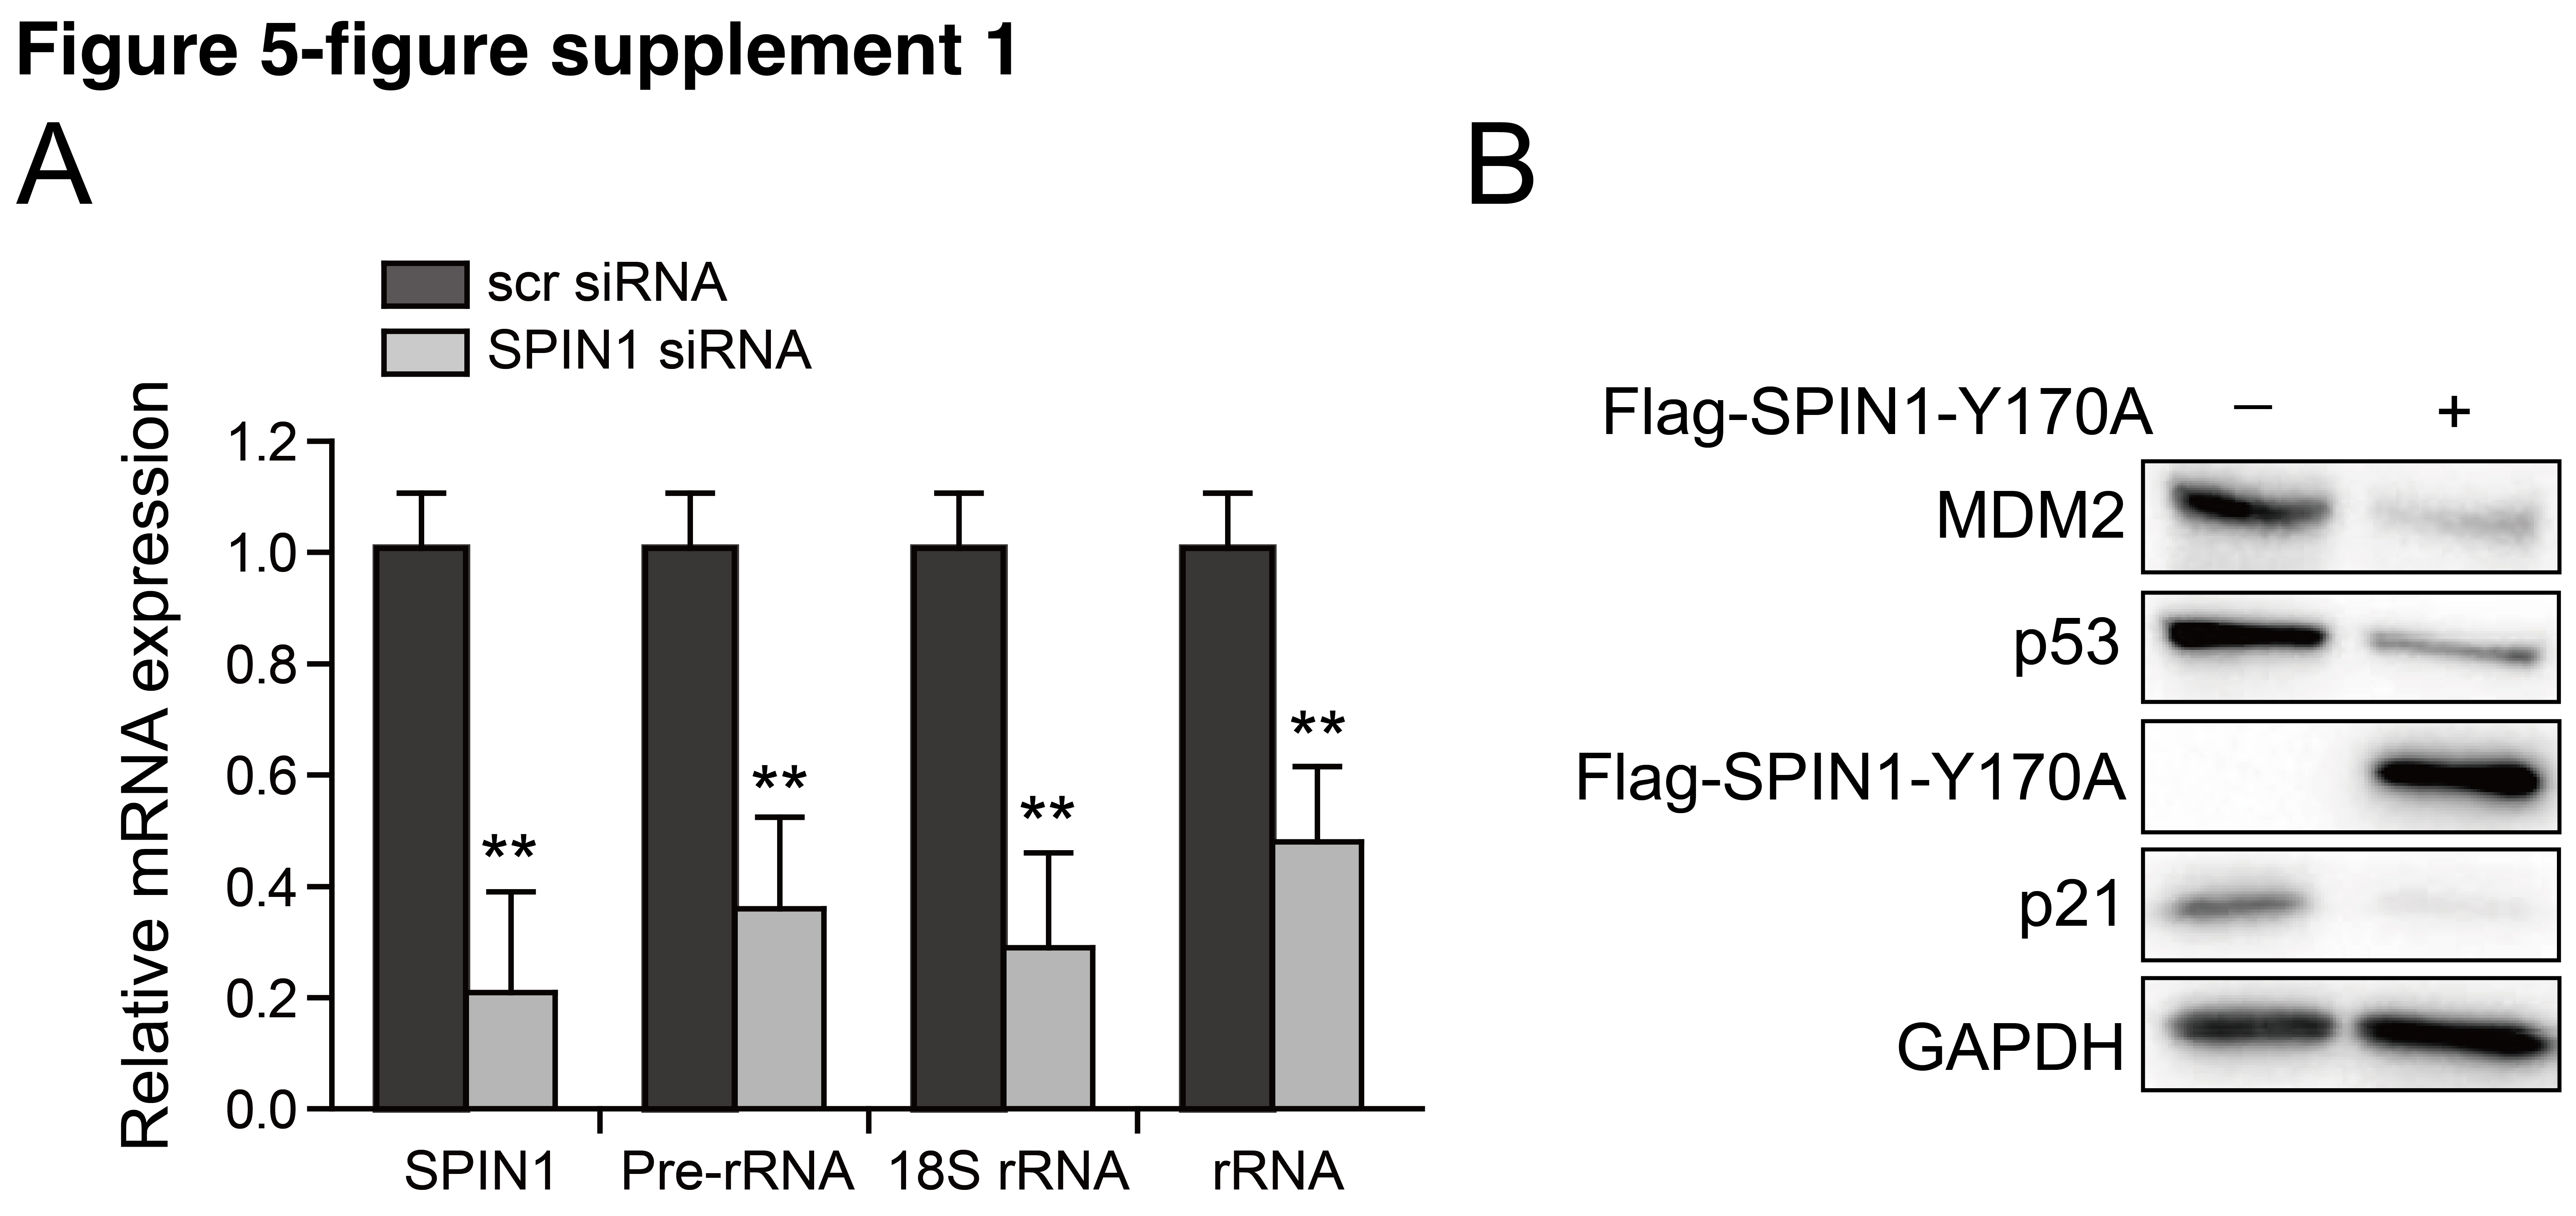

Supplement: supp [file elife-31275-supp-v1.zip › elife_poa_e31275_Figure_5_figure_supplement_1.jpg]

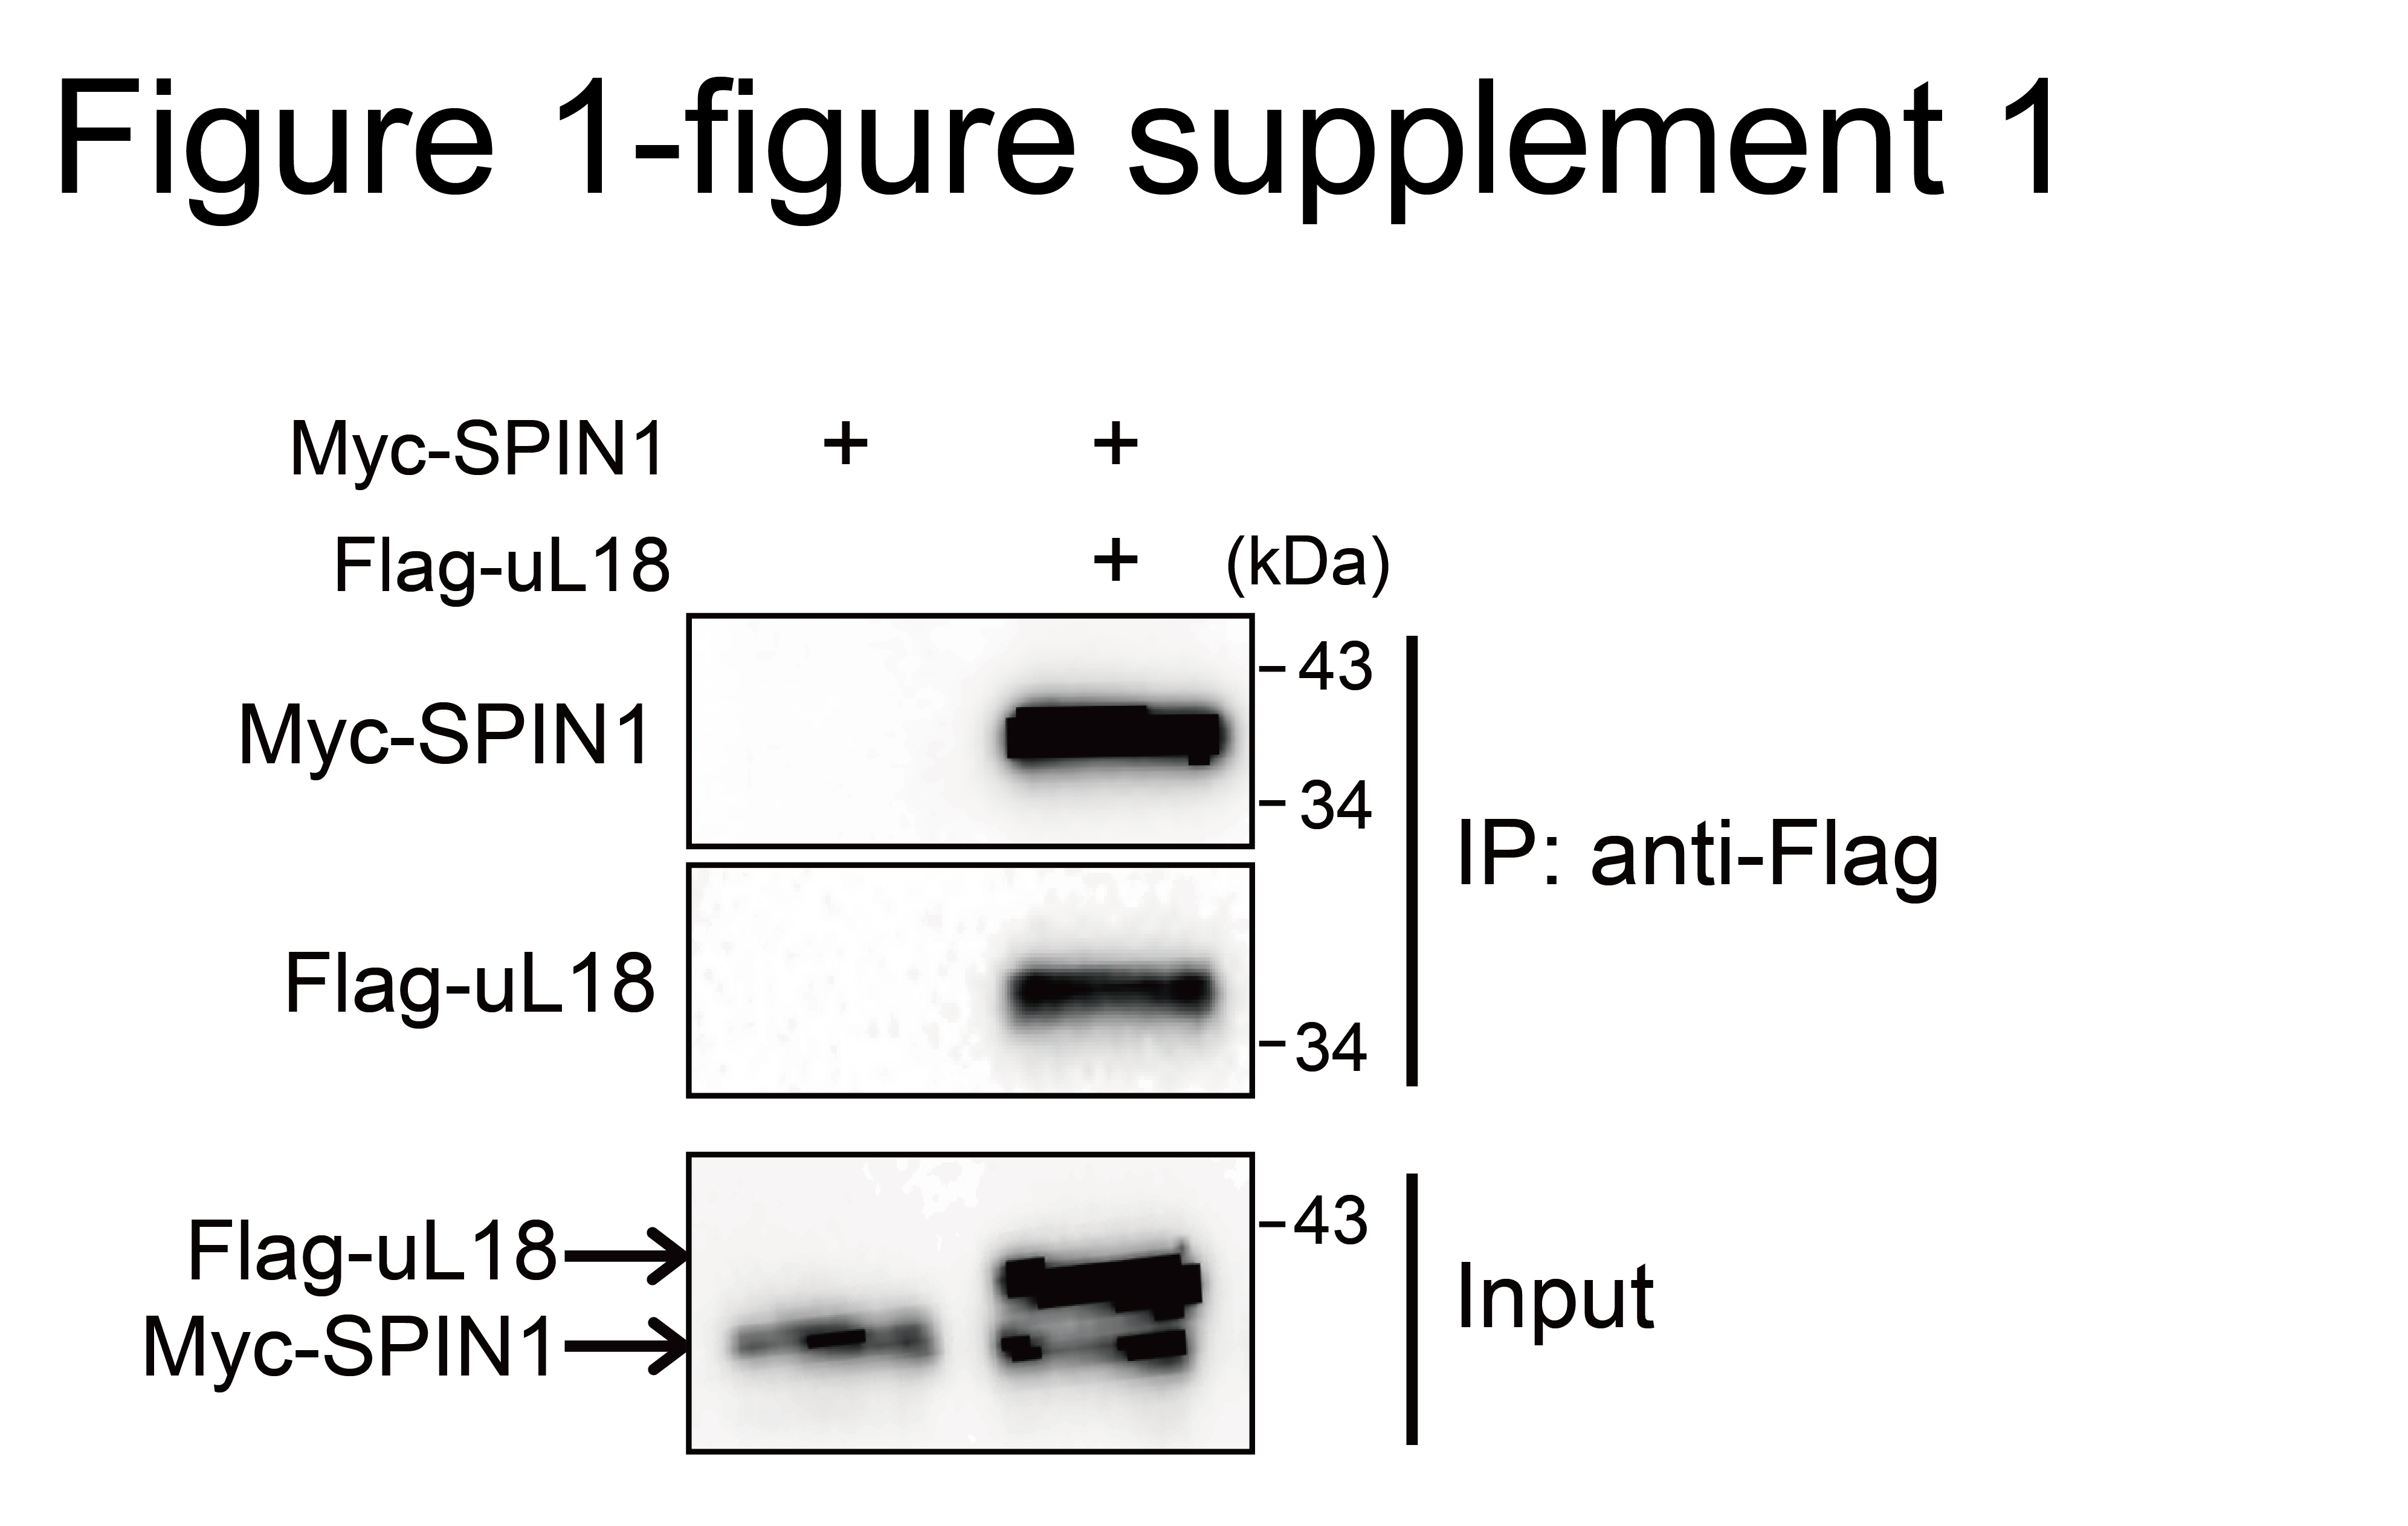

Supplement: supp [file elife-31275-supp-v1.zip › elife_poa_e31275_Figure_1_figure_supplement_1.jpg]

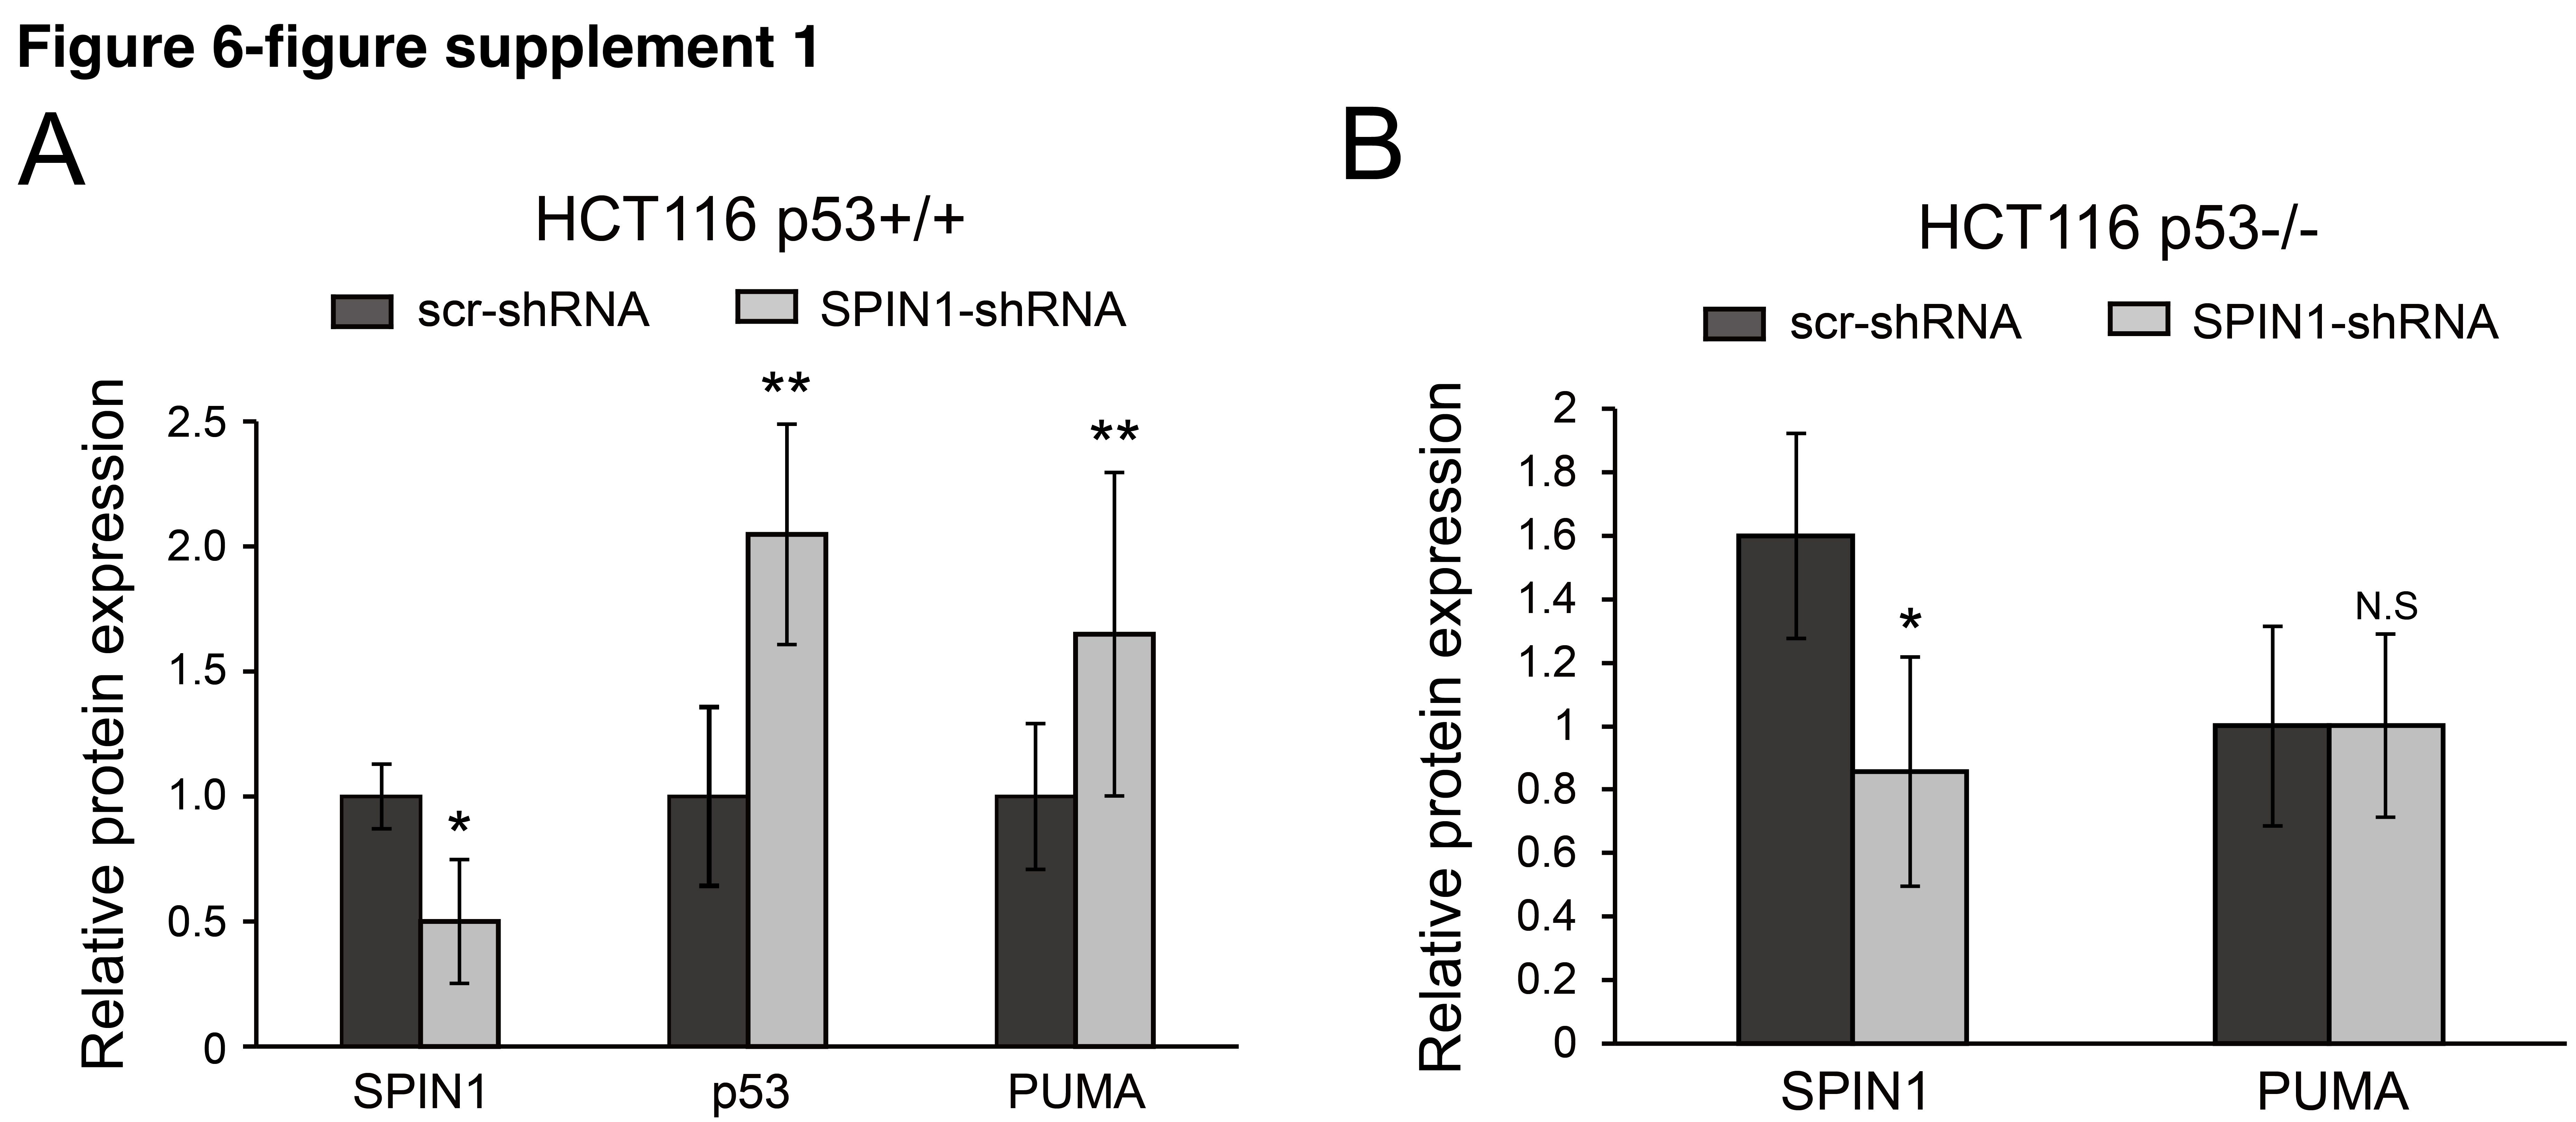

Supplement: supp [file elife-31275-supp-v1.zip › elife_poa_e31275_Figure_6_figure_supplement_1.jpg]
